1 **Original Article**

2 **Title:** The Relationship Between Symptoms and Job Loss among Japanese Workers During  
3 the COVID-19 Pandemic: A Prospective Cohort Study

4 **Running title:** Workers' symptoms and job loss

5

6 **Authors:**

7 Shintaro Okahara<sup>1</sup>, Yoshihisa Fujino<sup>2</sup>, Tomohisa Nagata<sup>1</sup>, Mami Kuwamura<sup>3</sup>, Kosuke  
8 Mafune<sup>4</sup>, Keiji Muramatsu<sup>5</sup>, Seiichiro Tateishi<sup>6</sup>, Akira Ogami<sup>7</sup>, Koji Mori<sup>1</sup>; for the  
9 CORoNaWork project

10 **Author contributions:**

11 **Affiliations:**

12 <sup>1</sup>Department of Occupational Health Practice and Management, Institute of Industrial  
13 Ecological Sciences, University of Occupational and Environmental Health, Japan,  
14 Kitakyushu, Japan

15 <sup>2</sup>Department of Environmental Epidemiology, Institute of Industrial Ecological Sciences,  
16 University of Occupational and Environmental Health, Japan, Kitakyushu, Japan

17 <sup>3</sup>Department of Environmental Health, School of Medicine, University of Occupational and  
18 Environmental Health, Japan, Kitakyushu, Japan

19 <sup>4</sup>Department of Mental Health, Institute of Industrial Ecological Sciences, University of

20 Occupational and Environmental Health, Japan, Kitakyushu, Japan

21 <sup>5</sup>Department of Preventive Medicine and Community Health, School of Medicine, University

22 of Occupational and Environmental Health, Japan, Kitakyushu, Japan

23 <sup>6</sup>Disaster Occupational Health Center, Institute of Industrial Ecological Sciences, University

24 of Occupational and Environmental Health, Japan, Kitakyushu, Japan

25 <sup>7</sup>Department of Work Systems and Health, Institute of Industrial Ecological Sciences,

26 University of Occupational and Environmental Health, Japan, Kitakyushu, Japan

27 **Author contributions:** SO, analysis and writing the manuscript; YF and TN, creating the

28 questionnaire, analysis, and drafting the manuscript; MK, KM(Kosuke Mafune), KM(Keiji

29 Muramatsu), ST, AO, and KM (Koji Mori); review of manuscripts, interpretation, and

30 funding for research. All authors have read and approved the final manuscript.

31 **Correspondence:**

32 Tomohisa Nagata, MD, PhD

33 Department of Occupational Health Practice and Management, Institute of Industrial

34 Ecological Sciences, University of Occupational and Environmental Health, Japan, 1-1

35 Iseigaoka, Yahatanishi-ku, Kitakyushu 807-8555, Japan.

36 email: tomohisa@med.uoeh-u.ac.jp; Tel: +81-93-603-1611; Fax: +81-93-603-2155

37 Number of words in the text: 2,771 words

38 Number of tables and figures: two tables and no figure

39

40 **Abstract**

41 **Objectives:** The aim of this study was to clarify which workers' symptoms led to  
42 unemployment during the COVID-19 pandemic.

43 **Methods:** This was a prospective cohort study using questionnaires about COVID-19  
44 administered to Japanese workers. A baseline survey conducted in December 2020 was used  
45 to determine workers' health history. Unemployment since the baseline survey was  
46 ascertained with a follow-up survey in December 2021. The odds ratios (ORs) of  
47 unemployment were estimated using a multilevel logistic model with adjusted covariates  
48 nested in prefecture of residence.

49 **Results:** Males ( $n = 8,682$ ) accounted for 58.2% of the total sample ( $n = 14,910$ ), and the  
50 mean age was 48.2 years. Multivariate analysis showed that workers with "pain-related  
51 problems," "limited physical movement and mobility," "fatigue, loss of strength or appetite,  
52 fever, dizziness, and moodiness," "mental health problems," or "sleep" had a greater  
53 probability of resigning for health reasons, resigning for all reasons other than retirement, and  
54 being unemployed. Those with "skin, hair, and cosmetic concerns" or "eye-related matters"  
55 had a greater probability of becoming unemployed.

56 **Conclusions:** We identified an association between workers' symptoms and resignation or  
57 unemployment, with different symptoms having different ORs. Furthermore, there were

58 differences in the associations among the effects of symptoms, work dysfunction,  
59 resignation/unemployment, and attitudes of others. Preventive interventions to help workers  
60 resolve or improve their symptoms could prevent their becoming unemployed or resigning.

61 **Keywords:** symptom, unemployment, COVID-19, SARS-CoV-2, workplace, Japan

62

63

64

65

66

67

68

69

70

71

72

73

74

75

76

77

78

## 79 **Introduction**

80 It is important to provide opportunities for workers with health conditions or illnesses to  
81 continue to work, not only to enhance their quality of life, but also to increase labor  
82 productivity and reduce the social security burden. Japan is facing a significant problem in  
83 the form of a declining labor force as a result of the falling birthrate and aging population.  
84 Thus, it is necessary to induce groups that currently cannot work to enter the labor force. For  
85 example, females, older people, and those unable to work for health reasons should be  
86 encouraged to participate in the labor market. It is also necessary to improve the labor  
87 productivity of workers currently participating in the labor market. The Japanese government  
88 introduced a policy of “harmonizing work with disease treatment and prevention” with the  
89 aim of creating a working and social environment in which workers with health problems can  
90 work stably over the long term<sup>1</sup>.

91 Workers with health problems face various difficulties in the workplace. A worker  
92 with a health problem might require short-term, long-term, or repeated absences from work  
93 as a result of either the need for medical treatment or their symptoms<sup>2-5</sup>. They face both  
94 quantitative and qualitative obstacles in relation to their work performance as a result of their  
95 symptoms and the side effects of treatment<sup>2,5-7</sup>, and can experience stigma related to their  
96 health problems in the workplace<sup>8,9</sup>. Thus, workers with health problems are likely to

97 experience unemployment<sup>10,11</sup> and remain unemployed for long periods of time<sup>12</sup>.

98         The COVID-19 pandemic has affected workers' disease management. Initially, it led  
99 to interruptions in treatment for those with chronic illnesses<sup>13</sup> because of concerns about  
100 COVID-19 infection, scheduling changes, restrictions on outpatient access as a result of  
101 limited medical resources, and people's economic instability. The pandemic also affected  
102 people's lifestyles with the introduction of lockdowns, social distancing, and working from  
103 home in an attempt to curb the spread of COVID-19, resulting in people becoming less  
104 physically active<sup>14,15</sup>. As people's levels of interaction decreased, their levels of stress,  
105 loneliness, and depression increased<sup>16-18</sup>, and alcohol consumption and smoking  
106 increased<sup>19-21</sup>.

107         The COVID-19 pandemic has created precarious employment conditions. In Japan, in  
108 an effort to prevent the spread of COVID-19, the economic activities of companies have been  
109 severely restricted, and people's consumption has also declined. This has had a significant  
110 impact on the Japanese economy, as evidenced by negative GDP growth<sup>22</sup>. In terms of  
111 employment and labor conditions, there was a significant drop in the number of employees,  
112 as well as a decrease in working hours and wages<sup>23</sup>. During the COVID-19 pandemic, about  
113 11% of Japanese workers who required regular treatment experienced treatment interruption.  
114 Disadvantageous socioeconomic status, poor health, and unfavorable lifestyle habits were  
115 associated with treatment interruption<sup>13</sup>.

116 Even prior to the COVID-19 pandemic, workers with health problems were more  
117 likely to experience unemployment, and this was most likely exacerbated by the COVID-19  
118 pandemic. However, the specific impact of the COVID-19 pandemic is unknown, and thus  
119 the aim of this study was to identify the symptoms among workers that led to unemployment  
120 during the COVID-19 pandemic.

121

## 122 **Materials and methods**

123 This study was conducted under the Collaborative Online Research on the Novel-coronavirus  
124 and Work (CORoNaWork) Project. The details of the study protocol are provided elsewhere<sup>24</sup>.  
125 Briefly, we administered a baseline questionnaire in December 2020 and a follow-up  
126 questionnaire in December 2021.

127 For the baseline survey in December 2020, a total of 33,087 workers were recruited  
128 throughout Japan from 605,381 randomly selected panelists who were registered with an  
129 Internet survey company. The inclusion criteria were currently working and aged 20–65 years,  
130 and we did not invite healthcare professionals or caregivers to participate. We used cluster  
131 sampling with stratification by sex, job type, and region. We excluded 6,051 invalid  
132 responses by the criteria used to determine unreliable responses included extremely short  
133 response times (less than 6 minutes), extremely low weight (less than 30 kg), extremely low  
134 height (less than 140 cm), inconsistent responses to similar questions throughout the survey

135 (e.g., questions about marital status and region of residence), and questions used to identify  
136 fraudulent responses. We distributed the follow-up questionnaire in December 2021 to the  
137 27,036 people with valid responses to the baseline questionnaire, of whom 18,560 responded  
138 (a follow-up response rate of 68.6%). We excluded self-employed workers (n=1,635),  
139 workers in small/home offices (n=284), agriculture, forestry, and fishery workers (n=146),  
140 professionals such as lawyers, tax accountants, and medical practitioners (n=1,137), and  
141 workers whose labor contract differed markedly from that of standard workers (n=448). This  
142 left a final sample of 14,910 workers.

143         The study was approved by the Ethics Committee of the University of Occupational  
144 and Environmental Health, Japan (reference nos. R2-079 and R3-006). Informed consent was  
145 obtained from all participants.

146 Explanatory variables

147 At baseline, we identified the workers' health conditions by asking them about symptoms  
148 known to be strongly associated with presenteeism in previous studies: "Which of the  
149 following is closest to the health problem that is most affecting your work?" They answered  
150 by selecting one of the following options: "No particular problems"; "Pain"; "Physical  
151 movement and mobility"; "Fatigue, loss of strength or appetite, fever, dizziness, and  
152 moodiness"; "Toileting and defecation"; "Mental health"; "Skin, hair, and cosmetic  
153 concerns"; "Sleep"; "Eye-related matters"; "Nasal matters"; "Hearing"; or "Other"<sup>25</sup>.



154 Outcomes

155 Resignation and unemployment were ascertained as follows. First, the baseline survey was  
156 limited to people who were employed at the time. In the follow-up survey, in response to the  
157 question “Have you retired (or changed jobs) since December 2020?” respondents were asked  
158 to select one of the following six options: “I have not retired (or changed jobs) at all”; “I have  
159 retired (or changed jobs) for health reasons”; “I have retired (or changed jobs) because of  
160 company downsizing, termination of employment, or expiration of contract”; “I have retired  
161 (or changed jobs) because of bankruptcy, or business closing”; “I have retired because of  
162 mandatory retirement”; or “I have retired (or changed jobs) for other reasons.” If the  
163 respondent answered that “I have retired (or changed jobs) for health reasons,” this was  
164 defined as “resigned for health reasons.”

165 The follow-up survey also asked whether there had been a period of unemployment  
166 since December 2020. If the participants had experienced unemployment between the  
167 baseline and follow-up surveys, this was defined as “experienced unemployment.”

168 Control variables

169 We retrieved the following data from the baseline survey for inclusion as control variables:  
170 age, sex, marital status, annual household income, education, job type, company size (number  
171 of workers), smoking status, and alcohol consumption habits. Age was treated as a continuous  
172 variable. Marital status was classified into three categories as follows: married, divorced or

173 widowed, and never married. Annual household income was classified into four categories as  
174 follows: less than 4 million Japanese yen (JPY), 4.00–5.99 million JPY, 6.00–7.99 million  
175 JPY, and 8 million JPY or more. Education was classified into three categories as follows:  
176 junior high school, high school, and vocational school/college, university, or graduate school.  
177 Job type was classified into three categories as follows: desk work, work involving  
178 communicating with people, and manual work. Company size (number of workers) was  
179 classified into four categories as follows: less than 30, 30–99, 100–999, and 1000 or more.  
180 Smoking status was categorized into two categories as follows: current smoker or nonsmoker.  
181 Alcohol consumption habits were categorized into three categories as follows: consuming  
182 alcohol on 4 or more days per week; consuming alcohol on 3 or fewer days per week; and  
183 rarely or never consuming alcohol.

#### 184 Statistical analyses

185 In the analyses, health conditions were treated as the exposure variables, and resignation or  
186 unemployment were treated as the outcome variable. The odds ratios (ORs) of experiencing  
187 resignation or unemployment associated with each health condition were estimated using a  
188 multilevel logistic model, which was nested in the prefecture of residence to account for  
189 regional differences. Age/sex-adjusted and multivariate-adjusted ORs were estimated. The  
190 multivariate model included age, sex, marital status, annual household income, education, job  
191 type, company size (number of workers), smoking status, and alcohol consumption habits,

192 and the rate of incidence of COVID-19 by prefecture at baseline. A p value of less than 0.05  
193 was considered statistically significant. All analyses were conducted using Stata (Stata  
194 Statistical Software: Release 17; StataCorp LLC, TX, USA).

195

## 196 **Results**

197 The baseline characteristics of the respondents are shown in Table 1. The sample of 14,910  
198 included 8,682 males (58.2%) and the mean age was 48.2 years. A total of 475 participants  
199 (3.2%) resigned for health reasons, and 2430 participants (16.3%) experienced  
200 unemployment.

201 Table 2 shows the associations between various symptoms and resignation or unemployment.

202 For those participants who resigned for health reasons, the multivariate analysis showed that  
203 the OR of unemployment associated with pain-related problems was 2.21 (95% confidence  
204 interval (CI): 1.57–3.10), that associated with limited physical movement and mobility was  
205 4.00 (95% CI: 2.73–5.86), that associated with fatigue, loss of strength or appetite, fever,  
206 dizziness, and moodiness was 3.08 (95% CI: 2.19–4.31), that associated with mental health  
207 problems was 2.94 (95% CI: 2.22–3.90), and that associated with sleep-related problems  
208 was 2.09 (95% CI: 1.47–2.98).

209 Regarding unemployment, the multivariate analysis showed that the OR of unemployment  
210 associated with pain-related problems was 1.30 (95% CI: 1.09–1.55), that associated with

211 limited physical movement and mobility was 1.96 (95% CI: 1.56–2.46), that associated with  
212 fatigue, loss of strength or appetite, fever, dizziness, and moodiness was 1.54 (95% CI:  
213 1.26–1.87), that associated with mental health problems was 1.62 (95% CI: 1.39–1.90), that  
214 associated with skin, hair, and cosmetic concerns was 1.45 (95% CI: 1.06–1.97), that  
215 associated with sleep-related problems was 1.63 (95% CI: 1.37–1.94), and that associated  
216 with eye-related matters was 1.40 (95% CI: 1.14–1.71).

217

## 218 **Discussion**

219 The results of this study showed that workers who had a specific symptom were at increased  
220 risk of either resigning or experiencing unemployment during the following year. The  
221 symptoms presenting the greatest risk to employees in terms of resigning or experiencing  
222 unemployment were mobility-related issues, followed by chronic fatigue and mental health  
223 problems.

224 There are several possible mechanisms by which workers with health-related  
225 symptoms either resign or experience unemployment. First, workers with health-related  
226 symptoms experience impaired work functioning<sup>26</sup>, resulting in inability to perform certain  
227 tasks, such as business trips, shift work, and heavy lifting. Workers who experience impaired  
228 work functioning often either reduce their working hours, change their job descriptions, or  
229 change their workplace. This can lead to employment-related disadvantages, long-term

230 absence, and unemployment<sup>27-32</sup>. Second, workers with health problems have to reduce their  
231 working hours because of the need to attend medical appointments. Casual workers who do  
232 not have access to sick leave might have to leave their jobs to seek medical treatment. Third,  
233 workers with health problems can experience stigma in relation to their illness, which can  
234 lead to employment-related disadvantages and unemployment<sup>33,34</sup>. In particular, workers with  
235 infectious diseases, mental illness, or cancer are likely to experience discrimination,  
236 harassment, changes in job descriptions and workplaces, limited career advancement, and  
237 unemployment.

238 We examined the association between each symptom and resignation or  
239 unemployment in terms of the International Classification of Functioning, Disability and  
240 Health (ICF).

241 Workers with mobility-related issues experience limitations in relation to activities  
242 such as commuting or moving around the workplace, and also experience limitations in  
243 relation to the activities required in their job, such as carrying heavy objects and working at  
244 heights. Thus, workers with musculoskeletal disorders, which are one of the major causes of  
245 mobility-related issues, are more likely to experience unemployment<sup>35,36</sup>.

246 Fatigue, loss of strength or appetite, fever, dizziness, and moodiness are not related to  
247 a single disease or illness, but can present as symptoms of various diseases or illnesses. For  
248 example, they can occur in relation to infections, malignant neoplasms, or neuropsychiatric

249 disorders. Workers with these symptoms experience limitations in relation to their work  
250 performance, regardless of their job description. In addition, it is often difficult for fellow  
251 workers to recognize these symptoms, making it difficult for sufferers to obtain support from  
252 their supervisors and colleagues. This lack of support, which is listed as an environmental  
253 factor in the ICF, can result in them either resigning or losing their job.

254 Pain-related problems include various types of pain such as local pain, systemic pain,  
255 acute pain, and chronic pain, and are a major cause of presenteeism<sup>5-6</sup>. It has been estimated  
256 that 80% of Japanese workers are living with some form of pain<sup>37</sup>, which is directly related to  
257 various occupational limitations. For example, workers with back pain experience significant  
258 limitations at work, especially in relation to commuting and physical movement. Workers  
259 who experience headaches are not only limited in their physical activity, but also experience  
260 limitations in relation to work requiring mental functions such as memory, attention,  
261 cognition, and emotion. It is also known that chronic pain increases patient's anxiety and fear  
262 of pain, making them feel their pain more acutely, and reducing any pain-inducing physical  
263 activity. In addition, it is difficult for fellow workers to recognize that a worker is  
264 experiencing pain, leading to a lack of support from supervisors and colleagues.

265 Mental health problems include various mental impairments. Mental health problems  
266 impact workers' activities that require mental functions such as memory, attention, cognition,  
267 and emotions. For example, Johnston et al. (2019) identified work disabilities caused by

268 depression, including reduced ability to plan, make decisions, and execute tasks<sup>38</sup>. Workers  
269 with mental health problems have difficulty in obtaining support from supervisors and  
270 colleagues, and are likely to experience stigma and various disadvantages in the workplace.

271 Sleep-related problems result in fatigue and reduced strength, as well as impairment  
272 of mental functions such as memory, attention, and cognition<sup>39</sup>. It has been reported that  
273 workers with insomnia are at high risk of developing impaired work functioning<sup>40</sup>. In  
274 addition, workers with sleep-related problems might not receive understanding and  
275 consideration from their fellow workers because sleep-related problems are difficult to  
276 recognize.

277 The results of our study showed that eye- and hearing-related problems did not  
278 increase the risk of resignation and unemployment because visual and auditory impairments  
279 are likely to be easily recognized and accommodated by supervisors and colleagues. In  
280 addition, nasal problems did not increase the risk of resignation or unemployment, possibly  
281 because nasal functions are not required in many occupations. Toileting and  
282 defecation-related problems did not increase the risk of resignation or unemployment,  
283 possibly because although these functions are necessary for life support, they are not directly  
284 related to work performance in most cases.

285 The COVID-19 pandemic might have increased the risk of unemployment for  
286 workers with health problems for the following reasons. First, during the pandemic,

287 numerous companies introduced measures preventing workers with symptoms from coming  
288 to work in an attempt to limit the spread of the virus. Therefore, it is possible that some  
289 workers did not reveal their symptoms, knowing that they would be shunned by colleagues.  
290 Second, people with underlying conditions were at higher risk of severe illness or death from  
291 COVID-19. Thus, workers with symptoms might have avoided work involving contact with  
292 other people for fear of infecting vulnerable colleagues, thereby increasing the risk of  
293 resignation or unemployment. Third, the deterioration in employment conditions as a result of  
294 the COVID-19 pandemic might have increased the risk of retirement or unemployment for  
295 workers with specific symptoms. Fourth, the COVID-19 pandemic has had a negative impact  
296 on people's ability to continue disease management, exacerbating workers' symptoms and  
297 increasing the risk of resignation or unemployment as a result of worsening conditions that  
298 impede work participation.

299         This study has some limitations. First, unemployment information was based on  
300 self-reporting, although we expected few memory errors and little recall bias regarding  
301 changes in employment over the relatively short timeframe (one year). Second, no  
302 information was available regarding the onset of symptoms, severity, or treatment status.  
303 Despite having the same symptoms, the impact on people's risk of unemployment can differ  
304 depending on the severity of their illness and their treatment status. Third, this study did not  
305 include detailed job descriptions for the respondents. A worker's ability to perform his or her



306 job is determined not only by the type and severity of symptoms, but also by the nature and  
307 demands of the job, along with the support of co-workers and company systems<sup>41,42</sup>. Fourth,  
308 because this study was conducted during the COVID-19 pandemic, the impact of various  
309 symptoms on unemployment and retirement might have differed from that during  
310 non-pandemic periods, and thus further evaluation should be conducted over a longer period.

311 In conclusion, the results of this study indicate that workers with specific symptoms  
312 were at greater risk of resigning or experiencing unemployment during the following year,  
313 and different symptoms had different ORs. Therefore, preventive interventions to resolve or  
314 improve workers' symptoms could prevent their resigning or becoming unemployed.

315

316

### 317 **Acknowledgments**

318 This study was supported and partly funded by the research grant from the University of  
319 Occupational and Environmental Health, Japan (no grant number); Japanese Ministry of  
320 Health, Labour and Welfare (H30-josei-ippan-002, H30-roudou-ippan-007, 19JA1004,  
321 20JA1006, 210301-1, and 20HB1004); Anshin Zaidan (no grant number), the Collabo-Health  
322 Study Group (no grant number), and Hitachi Systems, Ltd. (no grant number) and scholarship  
323 donations from Chugai Pharmaceutical Co., Ltd. (no grant number). The funder was not  
324 involved in the study design, collection, analysis, interpretation of data, the writing of this

325 article or the decision to submit it for publication.

326 The current members of the CORoNaWork Project, in alphabetical order, are as follows: Dr.

327 Akira Ogami, Dr. Ayako Hino, Dr. Hajime Ando, Dr. Hisashi Eguchi, Dr. Keiji Muramatsu,

328 Dr. Koji Mori, Dr. Kosuke Mafune, Dr. Makoto Okawara, Dr. Mami Kuwamura, Dr. Mayumi

329 Tsuji, Dr. Ryutaro Matsugaki, Dr. Seiichiro Tateishi, Dr. Shinya Matsuda, Dr. Tomohiro

330 Ishimaru, and Dr. Tomohisa Nagata, Dr. Yoshihisa Fujino (present chairperson of the study

331 group), and Dr. Yu Igarashi. All members are affiliated with the University of Occupational

332 and Environmental Health, Japan.

333 We thank Geoff Whyte, MBA, from Edanz (<https://jp.edanz.com/ac>) for editing a draft of this

334 manuscript.

335

336 **Disclosure**

337 **Ethical approval:** This study was approved by the ethics committee of the University of

338 Occupational and Environmental Health, Japan (reference nos. R2-079 and R3-006).

339 **Informed consent:** Informed consent was obtained in the form of the website.

340 **Registry and the registration no. of the study/trial:** N/A

341 **Animal studies:** N/A

342 **Conflict of interest:** The authors declare no conflicts of interest associated with this

343 manuscript.

344 **Data availability statement:** The data supporting the findings of this study are available  
345 from the corresponding author, Tomohisa Nagata, upon reasonable request.

346

## 347 **References**

348 1. The Ministry of Health, Labour and Welfare. Harmonizing work with diseases treatment  
349 and prevention.

350 <https://www.mhlw.go.jp/stf/seisakunitsuite/bunya/0000115267.html>.

351 Accessed August 4, 2022.

352 2. James M Gwinnutt, Sarah Leggett, Mark Lunt, et al. RAMS and BRAGGSS  
353 co-investigators. Predictors of presenteeism, absenteeism and job loss in patients  
354 commencing methotrexate or biologic therapy for rheumatoid arthritis. *Rheumatology*  
355 (Oxford). 2020 Oct 1;59(10):2908-2919.

356 3. Hultin H, Lindholm C, Malfert M, et al. Short-term sick leave and future risk of sickness  
357 absence and unemployment- the impact of health status. *BMC Public Health*. 2012.  
358 10.1186/1471-2458-12-861.

359 4. Siegfried K, Annalisa B, Agnese C, et al. Predictors of sick leave days in patients affected  
360 by major depressive disorder receiving antidepressant treatment in general practice setting  
361 in Germany. *Int J Psychiatry Clin Pract*. 2021 Nov;25(4):393-402.

362 5. Nagata T, Mori K, Ohtani M, et al. Total Health-Related Costs Due to Absenteeism,

- 363 Presenteeism, and Medical and Pharmaceutical Expenses in Japanese Employers. *J Occup*  
364 *Environ Med.* 2018 May;60(5):e273-e280.
- 365 6. Yoshimoto T, Oka H, Fujii T, et al. The Economic Burden of Lost Productivity due to  
366 Presenteeism Caused by Health Conditions Among Workers in Japan. *J Occup Environ*  
367 *Med.* 2020 Oct;62(10):883-888.
- 368 7. Donna A, Erica WH, Vanessa P, et al. Four-year review of presenteeism data among  
369 workers of a large United States health care system: a retrospective prevalence study.  
370 *Hum Resour Health.* 2018 Nov 9;16(1):59.
- 371 8. Sungkeun S, Danbee K, Ka Ryeong Bae, et al. Association between cancer stigma and job  
372 loss among cancer survivors. *Psycho oncology.* 2021 Aug;30(8):1347-1355.
- 373 9. Mary Stergiou-Kita, Xueqing Q, Hau KY, et al. Stigma and work discrimination among  
374 cancer survivors: A scoping review and recommendations: Stigmatisation et  
375 discrimination au travail des survivants du cancer : Examen de la portée et  
376 recommandations. *Can J Occup Ther.* 2017 Jun;84(3):178-188.
- 377 10. Fenna R M Leijten, Astrid de Wind, Swenne G van den Heuvel, et al. The influence of  
378 chronic health problems and work-related factors on loss of paid employment among  
379 older workers. *J Epidemiol Community Health.* 2015 Nov;69(11):1058-65.
- 380 11. Takada M, Tabuchi T, Iso H. Newly diagnosed disease and job loss: a nationwide  
381 longitudinal study among middle-aged Japanese. *Occup Environ Med.* 2021

382 Apr;78(4):279-285.

383 12. Liina J, Heta M, Pekka M, et al. Health-related selection into employment among the  
384 unemployed. *BMC Public Health*. 2022 Apr 5;22(1):657.

385 13. Fujimoto K, Ishimaru T, Tateishi S, et al. A cross-sectional study of socioeconomic status  
386 and treatment interruption among Japanese workers during the COVID-19 pandemic. *J*  
387 *Occup Health*. 2021 Jan;63(1):e12232.

388 14. Arkaitz Castañeda-Babarro, Ane Arbillaga-Etxarri, Borja Gutiérrez-Santamaría, et al.  
389 Physical Activity Change during COVID-19 Confinement. *Int J Environ Res Public*  
390 *Health*. 2020 Sep 21;17(18):6878.

391 15. Iris A Lesser, Carl P Nienhuis. The Impact of COVID-19 on Physical Activity Behavior  
392 and Well-Being of Canadians. *Int J Environ Res Public Health*. 2020 May  
393 31;17(11):3899.

394 16. Prerna Varma, Moira Junge, Hailey Meaklim, et al. Younger people are more vulnerable  
395 to stress, anxiety and depression during COVID-19 pandemic: A global cross-sectional  
396 survey. *Prog Neuropsychopharmacol Biol Psychiatry*. 2021 Jul 13;109:110236.

397 17. Gianluca Serafini, Bianca Parmigiani, Andrea Amerio, et al. The psychological impact of  
398 COVID-19 on the mental health in the general population. *QJM*. 2020 Jun  
399 22;113(8):531-537.

400 18. William D S Killgore, Sara A Cloonan, Emily C Taylor, et al. Loneliness: A signature

- 401 mental health concern in the era of COVID-19. *Psychiatry Res.* 2020 Aug;290:113117.
- 402 19. Sarah E Jackson, Claire Garnett, Lion Shahab, et al. Association of the COVID-19  
403 lockdown with smoking, drinking and attempts to quit in England: an analysis of 2019-20  
404 data. *Addiction.* 2021 May;116(5):1233-1244.
- 405 20. Rachel O'Donnell, Douglas Eadie, Martine Stead, et al. 'I Was Smoking a Lot More  
406 during Lockdown Because I Can': A Qualitative Study of How UK Smokers Responded  
407 to the Covid-19 Lockdown. *Int J Environ Res Public Health.* 2021 May 28;18(11):5816.
- 408 21. Shihoko Koyama, Takahiro Tabuchi, Sumiyo Okawa, et al. Changes in Smoking Behavior  
409 Since the Declaration of the COVID-19 State of Emergency in Japan: A Cross-sectional  
410 Study From the Osaka Health App. *J Epidemiol.* 2021 Jun 5;31(6):378-386.
- 411 22. Japanese Cabinet Office. GDP (Expenditure Approach) and Its Components.  
412 <https://www.esri.cao.go.jp/en/sna/data/sokuhou/files/2022/qe222/gdemenuea.html>  
413 Accessed August 20, 2022.
- 414 23. ILO. The impact of the COVID-19 pandemic on jobs and incomes in G20 economies.  
415 [https://www.ilo.org/wcmsp5/groups/public/---dgreports/---cabinet/documents/publication/  
416 \[wcms\\\_756331.pdf\]\(https://www.ilo.org/wcmsp5/groups/public/---dgreports/---cabinet/documents/publication/wcms\_756331.pdf\).](https://www.ilo.org/wcmsp5/groups/public/---dgreports/---cabinet/documents/publication/wcms_756331.pdf)  
417 Accessed August 4, 2022.
- 418 24. Fujino Y, Ishimaru T, Eguchi H, et al. Protocol for a Nationwide Internet-based Health  
419 Survey of Workers During the COVID-19 Pandemic in 2020. *Journal of UOEH.* 2020;

420 43(2), 217–225.

421 25. Yoshihisa Fujino, Makoto Okawara, Yu Igarashi, et al. A prospective cohort study of  
422 presenteeism and poverty among Japanese workers during the COVID-19 pandemic. J  
423 Occup Health. 2022 Jan;64(1):e12342.

424 26. Nagata T, Fujino Y, Saito K, et al. Diagnostic Accuracy of the Work Functioning  
425 Impairment Scale (WFun): A Method to Detect Workers Who Have Health Problems  
426 Affecting their Work and to Evaluate Fitness for Work. J Occup Environ Med. 2017  
427 Jun;59(6):557-562.

428 27. Yoshihisa Fujino, Shuichiro Shazuki, Hiroyuki Izumi, et al. Prospective Cohort Study of  
429 Work Functioning Impairment and Subsequent Absenteeism Among Japanese Workers. J  
430 Occup Environ Med. 2016 Jul;58(7):e264-7.

431 28. Gignac MA, Cao X, Lacaille D, Anis AH, Badley EM. Arthritis-related work transitions:  
432 a prospective analysis of reported productivity losses, work changes, and leaving the  
433 labor force. Arthritis Rheum.2008;59(12):1805-1813.

434 29. Hansen CD, Andersen JH. Sick at work—a risk factor for long-term sickness absence at a  
435 later date? J Epidemiol Community Health. 2009;63(5):397-402.

436 30. Sundstrup E, Jakobsen MD, Mortensen OS, Andersen LL. Joint association of  
437 multimorbidity and work ability with risk of long-term sickness absence: a prospective  
438 cohort study with register follow-up. Scand J Work Environ Health. 2017;43(2):146-154.

- 439 31. Kouwenhoven-Pasmooij TA, Burdorf A, Roos-Hesselink JW, Hunink MGM, Robroek  
440 SJW. Cardiovascular disease, diabetes and early exit from paid employment in Europe;  
441 the impact of work-related factors. *Int J Cardiol.* 2016;215:332-337.
- 442 32. Koolhaas W, van der Klink JJJ, de Boer MR, Groothoff JW, Brouwer S. Chronic health  
443 conditions and work ability in the ageing workforce: the impact of work conditions,  
444 psychosocial factors and perceived health. *Int Arch Occup Environ Health.*  
445 2014;87(4):433-443.
- 446 33. Evelien P M Brouwers. Social stigma is an underestimated contributing factor to  
447 unemployment in people with mental illness or mental health issues: position paper and  
448 future directions. *BMC Psychol.* 2020 Apr 21;8(1):36.
- 449 34. Laurel Sprague, Sara Simon, Courtenay Sprague. Employment discrimination and HIV  
450 stigma: survey results from civil society organisations and people living with HIV in  
451 Africa. *Afr J AIDS Res.* 2011;10 Suppl 1:311-24.
- 452 35. N E Astrand, S O Isacsson. Back pain, back abnormalities, and competing medical,  
453 psychological, and social factors as predictors of sick leave, early retirement,  
454 unemployment, labour turnover and mortality: a 22 year follow up of male workers in a  
455 Swedish pulp and paper company. Astrand NE, Isacsson SO. *Br J Ind Med.* 1988  
456 Jun;45(6):387-95.
- 457 36. Lallukka T, Mänty M, Cooper C, et al. Recurrent back pain during working life and exit



- 458 from paid employment: a 28-year follow-up of the Whitehall II Study. *Occup Environ*  
459 *Med.* 2018 Nov;75(11):786-791.
- 460 37. The Ministry of Health, Labour and Welfare. Survey on State of Employees' Health 1997.  
461 <https://www.e-stat.go.jp/stat-search/files?page=1&layout=datalist&toukei=00450095&tst>  
462 [at=000001020508&cycle=0&tclass1=000001021031&tclass2=000001021033&stat\\_infid](https://www.e-stat.go.jp/stat-search/files?page=1&layout=datalist&toukei=00450095&tstat=000001020508&cycle=0&tclass1=000001021031&tclass2=000001021033&stat_infid)  
463 [=000001724949&tclass3val=0.](https://www.e-stat.go.jp/stat-search/files?page=1&layout=datalist&toukei=00450095&tstat=000001020508&cycle=0&tclass1=000001021031&tclass2=000001021033&stat_infid)  
464 Accessed August 17, 2022.
- 465 38. 2015;10(6):e0129262. Johnston, D. A., Harvey, S. B., Glozier, N., et al. The relationship  
466 between depression symptoms, absenteeism and presenteeism. *Journal of Affective*  
467 *Disorders. Journal of Affective Disorders*, 256, 536–540.
- 468 39. Litwiller B, Snyder LA, Taylor WD, Steele, LM. The relationship between sleep and  
469 work: A meta-analysis. *J Appl Psychol.* 2017;102(4):682-699.
- 470 40. Makoto Okawara, Tomohisa Nagata, Masako Nagata, et al. Association between the  
471 course of hypnotics treatment for insomnia and work functioning impairment in Japanese  
472 workers. *PLoS One.* 2020 Dec 10;15(12):e0243635.
- 473 41. Maria Sirén, Eira Viikari-Juntura, Jari Arokoski. Occupational differences in disability  
474 retirement due to a shoulder lesion: do work-related factors matter? *Int Arch Occup*  
475 *Environ Health.* 2020 Nov;93(8):983-993.
- 476 42. Ilmarinen J. Work ability--a comprehensive concept for occupational health research and

477 prevention. Scand J Work Environ Health. 2009;35(1):1-5.

478

479

480

481

482

483

484 Table 1. Baseline characteristics

|                                                        | n (%)         |
|--------------------------------------------------------|---------------|
| Total                                                  | 14910         |
| Age, mean (SD)                                         | 48.2 (9.9)    |
| Sex, men                                               | 8682 (58.2%)  |
| Marital status                                         |               |
| Married                                                | 8638 (57.9%)  |
| Divorced                                               | 1449 (9.7%)   |
| Never married                                          | 4823 (32.3%)  |
| Income (million JPY)                                   |               |
| Less than 4.00                                         | 3574 (24.0%)  |
| 4.00-5.99                                              | 3581 (24.0%)  |
| 6.00-7.99                                              | 3089 (20.7%)  |
| 8.00 and more                                          | 4666 (31.3%)  |
| Education                                              |               |
| Junior high school                                     | 178 (1.2%)    |
| High school                                            | 4047 (27.1%)  |
| Vocational school/college, university, graduate school | 10685 (71.7%) |
| Job type                                               |               |
| Desk work                                              | 8411 (56.4%)  |
| Work involving communicating with people               | 3231 (21.7%)  |
| Manual work                                            | 3268 (21.9%)  |

|                                    |              |
|------------------------------------|--------------|
| Company size (number of employees) |              |
| Less than 30                       | 3507 (23.5%) |
| 30-99                              | 2605 (17.5%) |
| 100-999                            | 4276 (28.7%) |
| 1000 and more                      | 4522 (30.3%) |
| Current smoker                     | 4108 (27.6%) |
| Alcohol drinking habits            |              |
| Drinking 4 or more days per week   | 5899 (39.6%) |
| Drinking 3 or less days per week   | 4361 (29.2%) |
| Rarely or never                    | 4650 (31.2%) |
| Resigned due to health reasons     | 475 (3.2%)   |
| Experienced unemployment           | 2430 (16.3%) |

---

485 JPY, Japanese yen

486 Table 2. The associations between various symptoms and resignation or unemployment

| Outcome                        | Symptom                                                              | age-sex adjusted |           |         | multivariate* |           |         |  |  |
|--------------------------------|----------------------------------------------------------------------|------------------|-----------|---------|---------------|-----------|---------|--|--|
|                                |                                                                      | OR               | 95%CI     | p value | OR            | 95%CI     | p value |  |  |
| Resigned due to health reasons |                                                                      |                  |           |         |               |           |         |  |  |
|                                | No particular problems                                               | reference        |           |         | reference     |           |         |  |  |
|                                | Pain                                                                 | 2.40             | 1.71 3.36 | <0.001  | 2.21          | 1.57 3.10 | <0.001  |  |  |
|                                | Physical movement and mobility                                       | 4.21             | 2.88 6.15 | <0.001  | 4.00          | 2.73 5.86 | <0.001  |  |  |
|                                | Fatigue, loss of strength, appetite, fever, dizziness, and moodiness | 3.31             | 2.37 4.63 | <0.001  | 3.08          | 2.19 4.31 | <0.001  |  |  |
|                                | Toileting and defecation                                             | 1.48             | 0.72 3.03 | 0.290   | 1.34          | 0.65 2.77 | 0.426   |  |  |
|                                | Mental health                                                        | 3.11             | 2.35 4.11 | <0.001  | 2.94          | 2.22 3.90 | <0.001  |  |  |
|                                | Skin, hair, and cosmetic concerns                                    | 1.18             | 0.57 2.43 | 0.654   | 1.16          | 0.56 2.39 | 0.694   |  |  |
|                                | Sleep                                                                | 2.15             | 1.51 3.06 | <0.001  | 2.09          | 1.47 2.98 | <0.001  |  |  |
|                                | Eye-related matters                                                  | 1.55             | 0.98 2.46 | 0.062   | 1.55          | 0.97 2.47 | 0.064   |  |  |
|                                | Nasal matters                                                        | 1.00             | 0.25 4.11 | 0.996   | 1.02          | 0.25 4.18 | 0.981   |  |  |
|                                | Hearing                                                              | 2.27             | 0.82 6.28 | 0.113   | 2.31          | 0.83 6.40 | 0.108   |  |  |
|                                | Other                                                                | 1.62             | 1.02 2.57 | 0.041   | 1.49          | 0.94 2.37 | 0.094   |  |  |
| Experienced unemployment       |                                                                      |                  |           |         |               |           |         |  |  |
|                                | No particular problems                                               | reference        |           |         | reference     |           |         |  |  |
|                                | Pain                                                                 | 1.44             | 1.21 1.71 | <0.001  | 1.30          | 1.09 1.55 | 0.004   |  |  |
|                                | Physical movement and mobility                                       | 2.09             | 1.67 2.61 | <0.001  | 1.96          | 1.56 2.46 | <0.001  |  |  |
|                                | Fatigue, loss of strength, appetite, fever, dizziness, and moodiness | 1.68             | 1.39 2.04 | <0.001  | 1.54          | 1.26 1.87 | <0.001  |  |  |

|                                   |      |      |      |        |      |      |      |        |
|-----------------------------------|------|------|------|--------|------|------|------|--------|
| Toileting and defecation          | 1.36 | 1.00 | 1.87 | 0.053  | 1.23 | 0.89 | 1.69 | 0.201  |
| Mental health                     | 1.71 | 1.46 | 1.99 | <0.001 | 1.62 | 1.39 | 1.90 | <0.001 |
| Skin, hair, and cosmetic concerns | 1.46 | 1.08 | 1.98 | 0.015  | 1.45 | 1.06 | 1.97 | 0.019  |
| Sleep                             | 1.67 | 1.41 | 1.99 | <0.001 | 1.63 | 1.37 | 1.94 | <0.001 |
| Eye-related matters               | 1.41 | 1.16 | 1.72 | 0.001  | 1.40 | 1.14 | 1.71 | 0.001  |
| Nasal matters                     | 1.20 | 0.70 | 2.05 | 0.517  | 1.20 | 0.69 | 2.07 | 0.514  |
| Hearing                           | 0.72 | 0.37 | 1.39 | 0.331  | 0.71 | 0.36 | 1.37 | 0.305  |
| Other                             | 1.58 | 1.30 | 1.94 | <0.001 | 1.46 | 1.19 | 1.78 | <0.001 |

487 OR, odds ratios; CI, confidence interval.

488 A multilevel logistic model was used nested in prefectures of residence.

489 \* The model included age, sex, marital status, annual household income, education, job type, company size (number of employees), smoking status, and alcohol

490 drinking habits at baseline survey.
